# Supplementary material for: Cell-Free Circulating (Tumor) DNA before Surgery as a Prognostic Factor in Non-Metastatic Colorectal Cancer: A Systematic Review
Source: Cancers (Basel). 2022 Apr 29;14(9):2218. doi: 10.3390/cancers14092218 (PMC9101623; doi:10.3390/cancers14092218)
Supplement: Supplementary file 1 [file cancers-14-02218-s001.zip › Table S1 Overview of all included studies and their characteristics_final.xlsx]

## Sheet: Table complete
Cell free DNA
Author, year (ref)	Study design	Number of hospitals	Inclusion criteria	Timing of blood collection	Biomarkers	Assay	Tumor informed Yes/No	Quantitative and/or qualitative	Number of CRC patients	Tumor type + stage	Sex	Age	% positive presurgery	Quantification presurgery	Follow-up	Correlation with stage	Recurrence Yes/No	Disease-free Survival	Overall Survival
Czeiger, 2016 (20)	Prospective, observational	1 (Israel)	Patients with primary CRC	1 week before surgery	Cell-free DNA (quantification)	Fluorochrome SYBR Gold	No	Cutoff value of 800 ng/mL is being used	38	34 CC, 4 RC Stage I: 5 pt Stage II: 20 pt Stage III: 7 pt Stage IV: 5 pt Excluded: 1	45% male, 55% female	Mean 68±11y	49% above cutoff	Mean 816 ± 410 ng/mL	5 year		See disease-free survival	800ng/mL cutoff: DFS rate: 40,3%. Sensitivity 100%, for cancer-related mortality and DFS. Multivariate Cox regression: HR cfDNA 6.03 (95% CI 1,87-19,41)	800ng/mL cutoff: Sensitivity 92%, specificity 72% for all-cause mortality. Multivariate Cox regression: HR cfDNA 3.53 (95% CI 1,46-8,55)
Guadalajara, 2008 (21)	Retrospective analysis	1 (Madrid, Spain)	CRC patients with surgical resection	Just before start of surgery	Cell-free DNA (quantification)	Spectrophotometry (NanoDrop ND-1000)	No	Quantitative	73	48 CC, 24 RC, 1 benign Stage I: 17 pt Stage II: 25 pt Stage III: 19 pt Stage IV: 11 pt	64% male, 36% female	Mean 68.2 ± 11.4y (range 43-85y)	Not reported.	Mean 108 ± 156 ng/uL	Mean 554 ± 278 days (range 10-1407 days)		11% developed metastases. No significant correlation between cfDNA concentration and development of metastases.	Not reported.	Mortality rate 19.2%. No significant correlation between cfDNA concentration and mortality, but trend towards worse prognosis for patients with cfDNA concentration >60 ng/uL
Fleming, 2020 (22)	Prospective, observational	1 (Cork, IRL)	Patients with resectable CC	Before surgery (not other specified) + multiple timepoints post-surgery	Cell-free DNA (quantification)	Nanodrop 1000 Spectrophotometer (ThermoFisher Scientific)	No	Quantitative	20	Stage I-III colon cancer	75% male, 25% female	Median 69y (IQR 58-74y)	Not reported.	Mean 320 ± 15,5 ng/dL	Median 22 months (range 14-36 months)		3/20 (15%). Figure B: slightly higher presurgery cfDNA levels compared to non-recurrence	Not reported.	Not reported.
Zhong, 2020 (23)	Prospective, observational	Not reported (China)	Patients with primary CRC who had not undergone surgery, with KPS > 60 and without major comorbidity	10 days before surgery + 10 days after surgery	Cell-free DNA (quantification)	Quantitative PCR (qPCR)	No	Quantitative	60	24 CC, 36 RC Stage I-II: 26 pt Stage III-IV: 34 pt	57% male, 43% female	Mean 49±4.1y (range 32-77y)	Not reported.	Mean 26.12 ± 8.59 ng/mL	<1,5 year		Not reported.	cfDNA concentration was an independent risk factor for PFS in both univariate and multivariate regression analysis	Not reported.
Somatic alterations
Author, year	Study design	Number of hospitals	Inclusion criteria	Timing of blood collection	Biomarkers	Assay	Tumor informed Yes/No	Quantitative and/or qualitative	Number of CRC patients	Tumor type + stage	Sex	Age	% positive presurgery	Quantification presurgery	Follow-up	Correlation with stage	Recurrence Yes/No	Disease-free Survival	Overall Survival
Wang, 2004 (24)	Prospective, observational	1 (Kaohsiung, Taiwan)	CRC patients undergoing surgical resection	At time of surgical resection	APC, KRAS, P53	Polymerase Chain Reaction-Single Strand Conformation Polymorphism (PCR-SSCP) + direct sequencing	Yes	Qualitative	104	68 CC, 36 RC Stage I: 7 pt Stage II: 49 pt Stage III: 39 pt Stage IV: 9 pt	49% male, 51% female	ctDNA detected: mean 62.1 ± 2.0y ctDNA negative: mean 65.9 ± 1.9y	Tumor: 78/104 (75%) ctDNA: 36/78 (46.2%)	Not reported	Mean 19.7 ± 6.3 months	Tendency toward a stage-dependent difference. Dukes A: 0% Dukes B: 22% Dukes C: 49%	ctDNA+: 27/36 (75%) ctDNA-: 4/42 (9,5%) p<0.001	Not reported	Not reported
Lecomte, 2002 (25)	Prospective, observational	1 (Paris, France)	Patients with primary CRC undergoing tumor resection	Immediately before surgical resection	cfDNA, KRAS2 (exon 12+13), p16 methylation	cfDNA: fluorescence emission KRAS2: mutant allele-specific amplification (MASA) PCR p16 methylation: methylation-specific PCR (MSP)	Yes KRAS2 + p16: 39/58 with at least 1 alternation (used for ctDNA analysis). 2 ctDNA failures -> 37 patients for ctDNA detection.	Qualitative	58	49 CC, 9 RC Stage 1: 8 pt Stage 2: 21 pt Stage 3: 16 pt Stage 4: 13 pt	50% male, 50% female	Mean 69y (range 39-93y)	cfDNA: 25/58 KRAS2: 10/22 tumor+ pt p16: 21/31 hypermethylated tumor KRAS2 + p16: 26/37 pt, stage I-III: 17/25.	cfDNA: range: 105-709 ng/mL	Mean: 22 months	No significant correlation with stage	6 recurrences in 25 stage I-III patients with available ctDNA samples. Sensitivity 100%. Specificity 6/17%.	Significant worse RFS for stage I-III ctDNA+ patients: 2jr RFS = 66% (95% CI 36-84%) vs 100% voor ctDNA-	2 year OS: 48% for ctDNA+, 100% for ctDNA-. HR in multivariate Cox regression: 13 (95% 1,5-112). Significant worse OS for stage I-III ctDNA+ patients.
Shin, 2017 (26)	Prospective, observational	1 (Seoul, South Korea)	CRC patients undergoing curative surgical resection with KRAS mutation	Day before surgery	KRAS mutations	Sequenom MassARRAY and iPLEX-Pro chemistry technology platform + UltraHigh Sensitive (UHS) assay combining modified Amplification Refractory Mutation System (ARMS) and conventional iPLEX	No	Qualitative	160	Stage I-II: 19 pt Stage III: 35 pt Stage IV: 106 pt	Not reported	Not reported	9/54 (17%) in non-metastatic CRC patinets	Not reported	Not reported	Presence of detectable tumor-specific KRAS mutations in the plasma correlated with heavier tumor burden. Not other specified.	8/9 recurrences in ctDNA+ patients (sensitivity 89%). 35/45 recurrences in ctDNA- patients. (??)	Median PFS in ctDNA+ patients: 17.1 months Median PFS in ctDNA- patients: 20.6 months (not significant)	Not reported
Reinert, 2016 (27)	Retrospective analysis	1 (Aalborg, Denmark)	CRC patients who underwent curative surgery of which 6 relapsing and 5 non-relapsing patients were selected	Day 0 (before surgery), day 8, day 30 and every 3 months until 3 years of follow-up	Patient-specific somatic structural variants	Personalized 2-6 ddPCR assays after tissue analysis to identify SSVs	Yes	Qualitative	11	45% CC, 55% RC Stage 1: 1 pt Stage II: 5 pt Stage III: 2 pt Stage IV: 3 pt	64% male, 36% female	Mean 69y (range 56-81y)	0.73	Not reported	3 years		Recurrence: 5/6 with detectable ctDNA presurg Non-recurrence: 3/5 with detectable ctDNA presurg	Not reported	Not reported
Scholer, 2017 (28)	Prospective, observational with random selection aiming at 1:1 ratio of relapsing and non-relapsing patients	1 (Aarhus, Denmark)	CRC patients undergoing surgical treatment. Cohort 1: stage I-IV Cohort 2: mCRC	Day 0 (before surgery), day 8, day 30 and every 3 months until 3 years of follow-up	Patient specific structural variants and mutations present in tumor + hotspot KRAS mutations	ddPCR assay targeting 100 patient-specific somatic structural variants (SSVs), 6 hotspot mutations in KRAS and 4 patient-specific point mutations	Yes (WES)	Qualitative	45 Cohort 1: 27 patients Cohort 2: 18 patients	Cohort 1: 14 CC, 13 RC Stage 1: 5 pt Stage II: 8 pt Stage III: 8 pt Stage IV: 6 pt Cohort 2: 18 stage IV	67% male, 33% female	Mean 67y (range 45-89y)	Cohort 1: 20/27 (74%)	Not reported	3 years	Detection rate increased with stage: Stage I: 3/5 (60%) Stage II: 5/9 Stage III: 6/7 Stage IV: 6.6	8/10 ctDNA+ in stage I-III patients with relapse . 6/11 ctDNA+ in stage I-III patients without relapse	Not reported	Not reported
Thomsen, 2017 (29)	Retrospective cohort analysis	1 (Vejle, Denmark)	Non-metastatic colon cancer patients with complete tumor resection	Before surgery (within a 4-day window prior to operation)	RAS, BRAF	Droplet digital PCR (Bio-Rad)	Yes	Quantitative + qualitative	294	294 CC, 0 RC Stage 1: 40 pt Stage II: 151 pt Stage III: 103 pt	49% male, 51% female	Median 73y (range 35-94y)	0.423	Median MAF 0,098% (range 0,005-11%)	Median 3.9 years	Stage I: 17% Stage II: 43% Stage III: 52%	87 recurrences (29,6%)	Worse DFS for patients with RAS or BRAF mutation in serum (p = 0.026). RAS: HR 2.18 (95% CI 1.26-3.77) in multivariate COX regression BRAF and pMMR: HR 3.61 (95% CI 1.70-7.67) in multivariate COX regression	Worse OS for patients with RAS or BRAF mutation in serum (p = 0.012). RAS: HR 2.30 (95% CI 1.27-4.15) in multivariate COX regression BRAF and pMMR: HR 3.45 (95% CI 1.52-7.85) in multivariate COX regression
Tarazona, 2019 (30)	Prospective, observational	1 (Valencia, Spain)	Resectable, non-metastatic colon cancer patients	Before surgery (not other specified), 6-8 weeks after surgery and every 4 months until 5 years of follow-up	29 cancer-related genes	NGS (QIAseq Targeted DNA Panel for Illumina Instruments) for identifying mutations in tumor tissue. Personalized ddPCR assays for ctDNA detection based on tissue analysis.	Yes	Quantitative + qualitative	94	Stage I: 14 pt Stage II: 41 pt Stage III: 39 pt	65% male, 35% female	Median 71y (range 48-93y)	60/94 (63.8%)	Not reported.	Median 24.7 months (range 1-45.2 months)	Significant lower ctDNA concentration in stage I compared to stage II-III.	18 recurrences (21.2%)	No relation between baseline ctDNA detection and DFS: HR = 0.93 (95% CI: 0.33-2.69)	Not reported.
Nakamura, 2021 (31)	Prospective, observational	1 (Wakayama, Japan)	CRC patients undergoing surgery without neoadjuvant treatment	Just before start of surgery	KRAS mutations	QX200 Droplet digital PCR (Bio-Rad) and ddPCR KRAS multiplex assays (Bio-Rad)	No	Quantitative	180	140 CC, 40 RC 154 stage I-III CRC, 26 stage IV CRC	56% male, 44% female	26% <66y, 74% ≥66y	33%. 30% in stage I-III	MAF range 0,04-68.99%	Median 24 months (range 12-37 months)	Tendency toward lymph node and distant metastasis for ctDNA positive patients, not significant in multivariate analysis	21/150 patients (14%). Increased risk for patients with detectable KRAS (27% vs 9%, p = 0.003)	Inferior recurrence free interval (HR 3.08) + RFS (HR = 2.18) when KRAS detected	Not reported
Reinert, 2019 (12)	Prospective, observational	3 (Denmark)	Patients with stage I-III CRC	Up to 14 days before surgery	Patient specific mutations	Multiplex PCR-based NGS (Signatera)	Yes	Qualitative	125	119 CC, 6 RC Stage I: 5 pt Stage II: 39 pt Stage III: 81 pt	57% male, 43% female	Mean 69.9y (range 43-91y)	108/122 (88.5%)	Not reported	Median 12.5 months (range 1.4-38.5 months)		24 recurrences, eTable 5.		Not reported.
Allegretti, 2020 (32)	Prospective, observational	1 (Rome, Italy)	Cohort A: non-metastatic CRC pt before surgery of which 10 patients with available follow-up. (Cohort C: mCRC pt)	Day of surgery: preoperatively	15 cancer-related genes	NGS (MySeq/NextSeq, Illumina) and digital PCR (QuantStudio, ThermoFisher)	No	Quantitative + qualitative	39 (non-metastatic) versus 14 controls (mCRC)	Stage I: 9 pt Stage II: 14pt Stage III: 11 pt of other patients TNM not reported	52.8% male, 47.2% female	Not reported	44.1%	Yes: 57.8 ± 123.5 copies/mL, ranges 2.8–475.0 in group non-metastatic CRC vs 2313.9 ± 4119.7 copies/mL, ranges 21.8–12,215.3 in group mCRC	median 11.7 mnd, range 6-40 months	Weak, non-significant trends could be exclusively seen between ctDNA and pT	3/10 recurrences. 3 recurrences: 100% ctDNA+ before surgery. 7 non-recurrences: 4/7 ctDNA+ before surgery	not reported (small sample size of follow-up cohort)	not reported (small sample size of follow-up cohort)
Phallen, 2017 (33)	Retrospective analysis	4 (ILSBio, Aarhus, AMC Amsterdam, California)	CRC, LC, OC, BS patients and healthy individuals	At time of diagnosis, before surgery (not other specified)	58 cancer-related genes	TEC-seq	No (comparison with tissue analysis was made)	Quantitative	42	23 CC, 7 RC, 12 CRC Stage I: 8 pt Stage II: 9 pt Stage III: 10 pt Stage IV: 15 pt	38% male, 36% female, 26% unknown	Mean 72y (range 51-86y)	0.83	Median MAF for patietns with curative resction 0.21%. MAF range 0,05%-81,61% or all patients.	Median 28 months	Stage I: 50% Stage II: 89% Stage III: 90% Stage IV: 93%	Not reported.	Shorter PFS when increased ctDNA (p=0.0006 for digotomous, HR 1.13 as continuous variable)	Shorter OS when increased ctDNA (p<0.0001 for dichotomous, HR 1.13 as continuous variable)
Suzuki, 2020 (34)	Prospective, observational	3 (Tokyo/Yokohama/Matsudo, Japan)	Operatieve CRC and gastric cancer patients	Before surgery (not other specified), post surgery and every 3 months until 2 years of follow-up	52 cancer-related genes	NGS-based mutation analysis (Oncomine Pan Cancer Cell Free Assay, Therfmo Fisher Scientific). Follow-up (response monitoring) by ddPCR. Detection of Clonal Hematopoiesis derived mutations.	No	Quantitative	154 CRC patients, 46 gastric cancer patients	Stage I: 29 pt Stage II: 64 pt Stage III: 50 pt Stage IV: 11 pt	58% male, 42% female	Mean 71y ± 10y	113/154 (73%) in CRC patients	Median MAF 0,177% (range 0,067%-27,940%)	Max 2 years	Tendency of higher MAF in later stages. Stage I: 66% Stage II: 70% Stage III: 80% Stage IV: 82%	4 recurrences in CRC patients, all patients were ctDNA+ before surgery. Not other specified. MAF heat plot doesn't seem to discriminate between recurrence and non-recurrence patients	Not reported.	5 deaths in CRC patients: 3 with mCRC + 2 patients with recurrence.
Methylation
Author, year	Study design	Number of hospitals	Inclusion criteria	Timing of blood collection	Biomarkers	Assay	Tumor informed Yes/No	Quantitative and/or qualitative	Number of CRC patients	Tumor type + stage	Sex	Age	% positive presurgery	Quantification presurgery	Follow-up	Correlation with stage	Recurrence Yes/No	Disease-free Survival	Overall Survival
Matthaios, 2016 (35)	Prospective, observational	1 (Alexandroupolis, Greece)	CRC patients with WHO-PS 0-1 + healthy individuals	Preoperative (not other specified)	APC, RASSF1A methylation	Methylation-specific polymerase chain reaction (MSP)	No	Qualitative	155	88 stage I-III CRC 67 stage IV CRC	57% male, 43% female	Median 70y (range 44-76y). Mean 68 y ± 9.2y	APC: 33%. RASSF1A: 25%	Not reported.	Not reported	Significant association between methylation of APC/RASSF1A and higher stage	Not reported.	Not reported.	APC: 27 vs 81 months. RASSF1A: 46 vs 71 months
Xue, 2017 (36)	Prospective, observational	1 (Shanghai, China)	Sporadic CRC patients undergoing surgery without neoadjuvant treatment + healthy controls	Before surgery (not other specified)	Cystathionine-beta-synthase (CBS) hypomethylation	PCR using Applied Biosystems Veriti Thermal Cycler (Thermo Fisher Scientific) + Applied Biosystems 3130 Genetic Analyzer (Thermo Fisher Scientific)	No	Quantitative + qualitative	95	Stage I: 10 pt Stage II: 22 pt Stage III: 48 pt Stage IV: 15 pt	57% male, 43% female	Mean 54.6y (range 34-84y)	61/95 (64%), compared to 10/47 (21%) in healthy controls	Mean 45.13 ± 24,79%	Median 19 months (mean 37.5 months, range 6-60 months)		Increased recurrence rate for patients with low methylation level of CBS (P < 0.001): LPM 60.38% vs HPM 26,19%	Recurrence-free probability: RR 1,54 (95% CI 1.18-3.02) in multivariate analysis.	Decreased overall survival for patients with low methylation level of CBS (P < 0.001): 5y mortality LPM: 52.83% vs HPM: 21.43%. RR 1.35 (95% CI 1.09-2.41) in multivariate analysis.
Rasmussen, 2018 (37)	Prospective, observational cohort study	1 (Aalborg, Denmark)	CRC patients undergoing curative surgery	At time of diagnosis, prior to treatment	30 gene promotor regions	A rapid bisulfite method using two rounds of PCR	No	Qualitative (number of hypermethylated promoter regions)	193	T1-2: 33 pt T3-4: 154 pt M0: 159 pt M1: 34 pt N0: 121 pt N+ 66 pt	62% male, 38% female	≤ 67y: 47% > 67y: 53%	Not reported	Median level of cell-free DNA: 4.00 ng/mL (range 0-132.58) Median number of hypermethylated promoter regions: 5 in stage I-III CRC vs 9 in mCRC	5 years	Trend towards an increase in number of hypermethylated regions and advanced tumor	Not reported.	Not reported.	Clear and significant association between overall survival and >4 methylated promotor regions. HR of 2.53 (1.60; 3.90) for hypermethylation of RARB or RASSF1A in multivariable Cox-regression
Lin, 2015 (38)	Prospective, observational	1 (Tapei, Taiwan)	CRC patients undergoing elective surgery without neoadjuvant treatment	Before surgery (not other specified)	TWIST1, FLI1, AGBL4. (ZNF625 and MDFI were not detectable in the test phase)	Sequenom MassArray system using EpiTYPER software	Only to identify methylation markers to develop a methylation assay for cfDNA	Qualitative	353	238 CC, 109 RC Stage I: 42 pt Stage II: 140 pt Stage III: 108 pt Stage IV: 63 pt	59% male, 41% female	Median 67y (range 31-84y)	93,2% with at least one hypermethylated promoter gene. AGBL4: 65.2%, FLI1: 65.7%, TWIST1: 70.0%	Not reported.	Median 56 months (range 12-108 months)	No correlation with stage.	112 patients with progression to metastatic disease.	3-year DFS for patients with three hypermethylation markers: 63.3% vs 78.7% for two or less hypermethylation markers (p<0.001). No association between (number of) hypermethylation markers and DFS in multivariate analysis.	Not reported.
Wallner, 2006 (39)	Observational	2 (Munich, Germany)	Newly diagnosed colorectal cancer patients undergoing surgery	Before any intervention (not other specified)	HPP1, HLTF, hMLH1 (selected out of 12 genes by using a gene evaluation set)	MethyLight (fluorescence-based, real-time PCR assay)	No	Quantitative + qualitative	104 (77 with follow-up available)	Stage I: 15 pt (FU: 10) Stage II: 34 pt (FU: 24) Stage III: 37 pt (FU: 27) Stage IV: 18 pt (FU: 15)	56% male, 44% female	Mean 68y (range 33-92y)	HLTF: 22% HPP1: 12% hMLH1: 23%	Not reported.	5 years	Higher percentage of HLTF and HPP1 methylation in higher stages	Not reported.	Not reported.	HLTF: Relative risk of death = 3.0 (1.4-6.4). HPP1: Relative risk of death = 5.1 (2.2-11.6). hMLH1: Relative risk of death = 1.4 (0.6-3.1). For stage II: Relative risk of death = 11.8 (1.9-74.7) for HPP1 and/or HLTF. Multivariate analysis: HPP1 and/or HLTF: RRD = 3.4 (1.4-8.1)
Herbst, 2009 (40)	Prospective, observational	2 (Munich, Germany)	Stage I-III CRC patients undergoing curative surgery	Before surgery (not other specified)	HLTF, HPP1/TPEF	MethyLight (fluorescence-based, real-time PCR assay)	No	Qualitative	106	33 CC, 29 RC (44 unknown) Stage I: 13 pt Stage II: 39 pt Stage III: 54 pt	Not reported.	Mean 66y (range 33-89y)	HLTF: 13/106 = 12% HPP1: 6/106 = 6%	Not reported.	5 years	No correlation with stage.	36 recurrences. HLTF-: 28/93 (30%) HLTF+: 8/13 (62%). RR HLTF+ 2.7 (95% CI 1.2-6.0) HPP1-: 32/100 (32%) HPP1+: 4/6 (67%) RR HPP1+: 2.9 (95% CI 1.0-8.3) Multivariate analysis: RR 2.5 (95% CI 1.1-5.6) for HLTF+	Significant worse recurrence free survival for HLTF+ patients (p=0.014)	Not reported.
Liu, 2016 (41)	Prospective, observational	1 (Singapore)	Patients with sporadic CRC undergoing elective curative surgical resection without neoadjuvant treatment	Within one week before surgery	7 target genes (SST, MAL, TAC1, SEPT9, EYA4, CRABP1, NELL1)	Fluorescence-based quantitative PCR (qPCR)	No	Quantitative + qualitative	165	99 CC, 66 RC Stage I: 26 Stage II: 62 Stage III: 62 Stage IV: 15	55% male, 45% female	Median 67y (range 33-91y)	50% (as methylation markers were dichotomized by the median values of individual genes)	Not reported.	Median 56 months (range 5-79 months)	Not reported.	43 stage I-III patients with recurrence (28.7%). Higher incidence of recurrence in high methylated SST (mSST) vs low mSST: 38.7% vs 18.7% (p = 0.005).	Methylated SST (mSST) is a significant and independent predictor for disease free survival in multivariate analysis (HR 2.60 (95% CI 1.37-4.94) for mSST). No significant relationship for the other methylation markers, like SEPT9.	Methylated SST (mSST) is a significant and independent predictor for cancer specific death in multivariate analysis (HR 1.96, 95% CI 1.06-3.62). No significant relationship for the other methylation markers, like SEPT9.
Bedin, 2017 (42)	Prospective, observational	Not specified. Authors from Italy	Diagnosis CRC, inclusion before any treatment (controlgroups: adenomas and healthy controls)	Before any medical treatment (before surgery, etc.), not further specified	SFRP1, OSMR. Also: total amount cfDNA (measured bij ALU 83 and ALU 244 levels).	cfDNA quantification: ALU-based qPCR by ampliﬁcation and quantiﬁcation of two amplicons: (ALU244) (ALU83). cfDNA integrity index : ratio of ALU244 to ALU83. Methylation: MethyLight assay (fluorescence-based, real-time PCR assay)	Yes	Quantitative + qualitative	114 (blood samples of 70 pt)	Stage I: 38, Stage II 29, Stage III 32, Stage IV 15	49% male, 51% female	Median 67yr, Q1-3 61-73yr	cfDNA methylation: 67.1%, cfDNA integrity index no significant difference with controls. cfDNA quantitative level 2.5 fold higher in CRC pt compared to controls and adenoma pt.	ALU 83 fragment median 17.58 ng/ml, ALU 244 median 7.56 ng/ml	Median 52 months	Increased cfDNA level in stage III and IV. No difference between stages for methylation.	6/95 (6.3%) recurrences. No association with methylation status.	DFS not associated with methylation status.	28/100 (28%) deaths. OS not associated with methylation status. High cfDNA level is associated with poor prognosis. In multivariate analysis: ALU83: HR 2.71 (95%CI 1.22-6.02), ALU244: HR 2.40 (95% CI 1.11-5.19).
Song, 2018 (43)	Prospective, observational	4 (China)	Stage II-IV CRC patients between 30 and 80y planned for surgery	Preoperative (not other specified), day 1 and 7 after surgery	Methylated SEPT9	Epi proColon 2.0 CE	No	Quantitative + qualitative	120	Stage I: 14 pt Stage II: 40 pt Stage III: 45 pt Stage IV: 21 pt	60% male, 40% female	<40y: 4 pt 40-49y: 13 pt 50-59y: 21 pt 60-69y: 54 pt >70y: 28 pt	0.87	Mean 'relative methylation value': -0.71 (95% CI -1.68-0.25)	21 months	Correlation between SEPT9 and tumor size. Higher detectoin rate in higher stage.	Not reported.	Not reported.	82 stage I-III patients with available follow-up. Univariate analysis: HR 2.51 (95% CI 1.03-6.12) for mSEPT9+
Constâncio, 2019 (44)	Case control, retrospective cohort	1 (Porto, Portugal)	Male stage I-IV LC, PCa and CRC patients without previous oncological treatment	Before surgery (not other specified)	APC, FOXA1, GSTP1, HOXD3, RARβ2, RASSF1A, SEPT9, SOX17	Multiplex quantitative methylation-specific PCR	No	Quantitative + qualitative	100	59 CC, 41 RC Stage I-II: 39 pt Stage III: 43 pt Stage IV: 18 pt	100% male, 0% female	Median 66y (range 27-93y)	Sensitivity SEPT9: 8% Sensitivity SOX17: 11%		Median 13 months (range 0-44 months)	Higher levels in mCRC patients compared to non-mCRC patients. Not other specified.	Not reported	Not reported	Not reported for stage I-III separately. Stage I-IV: Association between RARβ2, SEPT9 and SOX17 and disease specific mortality (9 cases)
Leon Arellano, 2020 (45)	Prospective, observational	1 (Madrid, Spain)	CRC patients, aged 50-75y, undergoing surgical treatment without neoadjuvant treatment and/or posterior ostomy	Before surgery (not other specified) and three months after surgery	SEPT9	7500 Fast Real-Time PCR System (Thermo Fisher Scientific)	No	Qualitative	10	10 CC, 0 RC Stage I: 0 pt Stage 2: 4 pt Stage 3: 3 pt Stage 4: 3 pt	60% male, 40% female	Median 67.5 y (range 53-75y)	0.8	Not reported.	Median 26 months (range 25-29 months)	Not reported.	ctDNA-: 0/2 recurrences ctDNA+: 4/8 recurrences (waarvaan 3 stadium IV pt). Dus voor niet-mCRC: 1/5)	Not reported.	Not reported.
Jin, 2021 (46)	Prospective, observational	Not specified. Authors from China.	CRC patients (not other specified)	Before surgery (not other specified), 1-14 days after surgery and during follow-up	SEPT9 (10 subregions)	Methylation-specific quantitative PCR (mqMSP)	Only to identify methylation markers to develop a methylation assay for cfDNA	Quantitative	82	12 CC, 70 RC Stage I: 5 pt Stage II: 30 pt Stage III: 40 pt Stage IV: 7 pt	65% male, 35% female	Median 66y (range 33-85y)	0.89	Not reported.	3 years	Significant higher methylation signals for stage III and IV than stage I and II.	20 recurrences. No correlation between ctDNA status or level and recurrence.	Not reported.	Not reported.
Luo, 2020 (47)	Retrospective analysis (+ prospective, observational but only focus on detection)	Not specified. Authors from China.	Retrospective: Patients with stage I-IV CRC + healthy people	Day of colonoscopy	Diagnostic score (cd-score) including 9 methylation markers	Deep sequencing of bis-DNA captured with molecular inversion probes. ddPCR paradigm featuring a BioRad QX-200 Droplet Reader and AutoDG to measure methylation status of cg10673833.	Only to identify methylation markers to construct a diagnostic score (cd-score)	Quantitative (high/low) and qualitative	Retrospective: 801 CRC patients, 1021 healthy controls	Retrospective: Right C 197, Left C 593 Stage I: 38 pt Stage II: 139 pt Stage III: 209 pt Stage IV: 406 pt Stage unknown: 9 pt	62% male, 38% female	Retrospective: mean 58y (range 24-85y) Prospective: range 45-75y	Sensitivity: 88%	Not reported.	Median 26.6 months (range 1-42 months)	Significant higher methylation score for stage III and IV than stage I and II.	Not reported. No differentiation between stage I-III and stage IV patients.	Not reported.	Significant lower OS for patients with a high combined prognosis score (cp-score): HR 2.24 (SE 0.11) in multivariate Cox regression.
