# Supplementary material for: Cell-Free Circulating (Tumor) DNA before Surgery as a Prognostic Factor in Non-Metastatic Colorectal Cancer: A Systematic Review
Source: Cancers (Basel). 2022 Apr 29;14(9):2218. doi: 10.3390/cancers14092218 (PMC9101623; doi:10.3390/cancers14092218)
Supplement: Supplementary file 1 [file cancers-14-02218-s001.zip › Table S2 Risk of Bias analysis using QUIPS_final.xlsx]

## Sheet: QUIPS table for manuscript
Study (First author, year)	QUIPS domain
	a) Study participation	b) Study attrition	c) Prognostic factor measurement	d) Outcome measurement	e) Study confounding	f) Statistical analysis and reporting	OVERALL SCORE	Comments		Stage IV
Czeiger, 2016	Low	Low	Low	Low	Low	Low	Low			13% stage IV
Fleming, 2020	Moderate	Low	Low	Low	Moderate	High	High	Comparison between presurgery samples only in graph, no statistical analysis		No stage IV
Guadalajara, 2008	Low	Low	Low	Low	Moderate	Moderate	Moderate	No multivariate analysis. Minimal reporting, no HR or p-values.		Excluded from analysis
Zhong, 2020	Moderate	Low	Low	Low	Low	Low	Low	Percentage of stage IV patients unknown, but multivariate analysis was performed		57% stage III-IV
Allegretti, 2020	Moderate	Low	Low	Low	Moderate	Moderate	High	Follow-up available for 10 patients only (3 recurrences). No multivariate analysis.		No stage IV
Lecomte, 2002	Low	Low	Low	Low	Low	Low	Low			Excluded from analysis
Nakamura, 2021	Moderate	Low	Low	Low	Low	Low	Low			14% stage IV
Phallen, 2017	Low	Low	Low	Low	Low	Low	Low			Excluded from analysis
Reinert, 2016	Low	Low	Low	Low	High	High	High	No statistical analysis due to limited amount of included patients		27% stage IV
Reinert, 2019	Low	Low	Low	Low	Moderate	High	High	Data in supplementary material, no statistical analysis		No stage IV
Scholer, 2017	Low	Low	Low	Low	Moderate	High	High	No statistical analysis due to limited amount of included patients		Excluded from analysis
Shin, 2017	Moderate	High	Low	Moderate	Low	High	High	43/54 (80%) of non-metastatic patients developed metachronous metastasis		66% stage IV
Suzuki, 2020	Low	Moderate	Low	Low	Moderate	High	High	Only patients with detectable ctDNA presurgery were included in follow-up analysis, no statistical analysis		Excluded from analysis
Tarazona, 2019	Low	Low	Low	Low	Low	Low	Low			No stage IV
Thomsen, 2017	Low	Low	Low	Low	Low	Low	Low			No stage IV
Wang, 2004	Low	Low	Low	Low	High	Moderate	High	No multivariate analysis, no time-to-event analysis		9% stage IV
Bedin, 2017	Low	Low	Low	Low	Low	Low	Low			13% stage IV
Constâncio, 2019	Low	Low	Low	Low	High	Low	High	No multivariate analysis due to limited amount of events		18% stage IV
Herbst, 2009	Low	Low	Low	Low	Low	Low	Low			No stage IV
Jin, 2021	Moderate	Low	Low	Low	High	Moderate	High	No multivariate analysis. No correlation described, but no p-value or HR reported.		9% stage IV
Leon Arellano, 2020	Low	Low	Low	Low	High	Moderate	High	Only 4 recurrences of which 3 in stage IV patients. Presurgery data only shown in tabel.		30% stage IV
Lin, 2015	Low	Low	Low	Low	Low	Low	Low			18% stage IV
Liu, 2016	Low	Low	Low	Low	Low	Low	Low			9% stage IV
Luo, 2020	Moderate	Low	High	Low	Low	Low	High	Editorial expression of concern: uncertainty about the assay used		51% stage IV
Matthaios, 2016	Low	Low	Low	Low	High	Moderate	High	No multivariate analysis. Mean overal survival is the only reported outcome.		43% stage IV
Rasmussen, 2018	Low	Low	Low	Low	Low	Low	Low			18% stage IV
Song, 2018	Low	Low	Low	Low	Moderate	Low	Low			Excluded from analysis
Wallner, 2006	Low	Moderate	Low	Low	Low	Low	Low			17% stage IV
Xue, 2017	Low	Low	Low	Low	Low	Low	Low			16% stage IV
										Legend
										No stage IV or excluded from analysis
										<20% stage IV
										>20% stage IV

## Sheet: QUIPS tool (description)
Domain	Prompting items for consideration	Ratings
a) Study participation	Adequate participation in the study by eligible persons	High bias: The relationship between the PF and outcome is very likely to be different for participants and eligible nonparticipants Moderate bias: The relationship between the PF and outcome may be different for participants and eligible nonparticipants Low bias: The relationship between the PF and outcome is unlikely to be different for participants and eligible nonparticipants
	Description of the source population or population of interest
	Description of the baseline study sample
	Adequate description of the sampling frame and recruitment
	Adequate description of the period and place of recruitment
	Adequate description of inclusion and exclusion criteria
b) Study attrition	Adequate response rate for study participants	High bias: The relationship between the PF and outcome is very likely to be different for completing and non-completing participants Moderate bias: The relationship between the PF and outcome may be different for completing and non-completing participants Low bias: The relationship between the PF and outcome is unlikely to be different for completing and non-completing participants
	Description of attempts to collect information on participants who dropped out
	Reasons for loss to follow-up are provided
	Adequate description of participants lost to follow-up
	There are no important differences between participants who completed the study and those who did not
c) Prognostic factor measurement	A clear definition or description of the PF is provided	High bias: The measurement of the PF is very likely to be different for different levels of the outcome of interest Moderate bias: The measurement of the PF may be different for different levels of the outcome of interest Low bias: The measurement of the PF is unlikely to be different for different levels of the outcome of interest
	Method of PF measurement is adequately valid and reliable
	Continuous variables are reported or appropriate cut points are used
	The method and setting of measurement of PF is the same for all study participants
	Adequate proportion of the study sample has complete data for the PF
	Appropriate methods of imputation are used for missing PF data
d) Outcome measurement	A clear definition of the outcome is provided	High bias: The measurement of the outcome is very likely to be different related to the baseline level of the PF Moderate bias: The measurement of the outcome may be different related to the baseline level of the PF Low bias: The measurement of the outcome is unlikely to be different related to the baseline level of the PF
	Method of outcome measurement used is adequately valid and reliable
	The method and setting of outcome measurement is the same for all study participants
e) Study confounding	All important confounders are measured	High bias: The observed effect of the PF on the outcome is very likely to be distorted by another factor related to PF and outcome Moderate bias: The observed effect of the PF on outcome may be distorted by another factor related to PF and outcome Low bias: The observed effect of the PF on outcome is unlikely to be distorted by another factor related to PF and outcome
	Clear definitions of the important confounders measured are provided
	Measurement of all important confounders is adequately valid and reliable
	The method and setting of confounding measurement are the same for all study participants
	Appropriate methods are used if imputation is used for missing confounder data
	Important potential confounders are accounted for in the study design
	Important potential confounders are accounted for in the analysis
f) Statistical analysis and reporting	Sufficient presentation of data to assess the adequacy of the analytic strategy	High bias: The reported results are very likely to be spurious or biased related to analysis or reporting Moderate bias: The reported results may be spurious or biased related to analysis or reporting Low bias: The reported results are unlikely to be spurious or biased related to analysis or reporting
	Strategy for model building is appropriate and is based on a conceptual framework or model
	The selected statistical model is adequate for the design of the study
	There is no selective reporting of results
	Source: Hayden JA, van der Windt DA, Cartwright JL, Côté P, Bombardier C. Assessing bias in studies of prognostic factors. Ann Intern Med. 2013;158(4):280-6
	Abbreviation: PF prognostic factor
